# Supplementary material
Source: publisher figshare collection journal article supplement (https://acs.figshare.com/ndownloader/files/27577617)
Supplement: Supplementary file 1 [file 27577617]

## Supporting Information

# Entropy-Driven Supramolecular Ring-Opening Polymerization of a Cyclic Hemoglobin Monomer for Constructing a Hemoglobin–PEG Alternating Polymer with Structural Regularity

Takashi MATSUHIRA and Hiromi SAKAI\*

Department of Chemistry, Nara Medical University, 840 Shijo-cho, Kashihara 634-8521, Japan

Phone/Fax: +81-744-29-8810; E-mail: [hirosakai@naramed-u.ac.jp](mailto:hirosakai@naramed-u.ac.jp)

### —Contents—

1. DLS measurements for CMs and XLSPs
2. SDS-PAGE analysis of XLCM-20 synthesized in a diluted condition
3. Estimation of intra-molecular distance between PEG-terminated  $\alpha\beta$  dimers from effective molarity
4. Estimation of root-mean-squared end-to-end distance of free PEG chain
5. Empirical PEG molecular weight dependence of maximal  $[M]_0$ ,  $[M]_{eq}$ , and DP

## 1. DLS measurements for CMs and XLSPs

The particle size distribution histograms of CMs and XLSPs determined by DLS measurement are shown in **Figure S1**. Using a larger PEG tended to show a larger particle size. The results are presented in **Tables 1** and **3** in the main text.

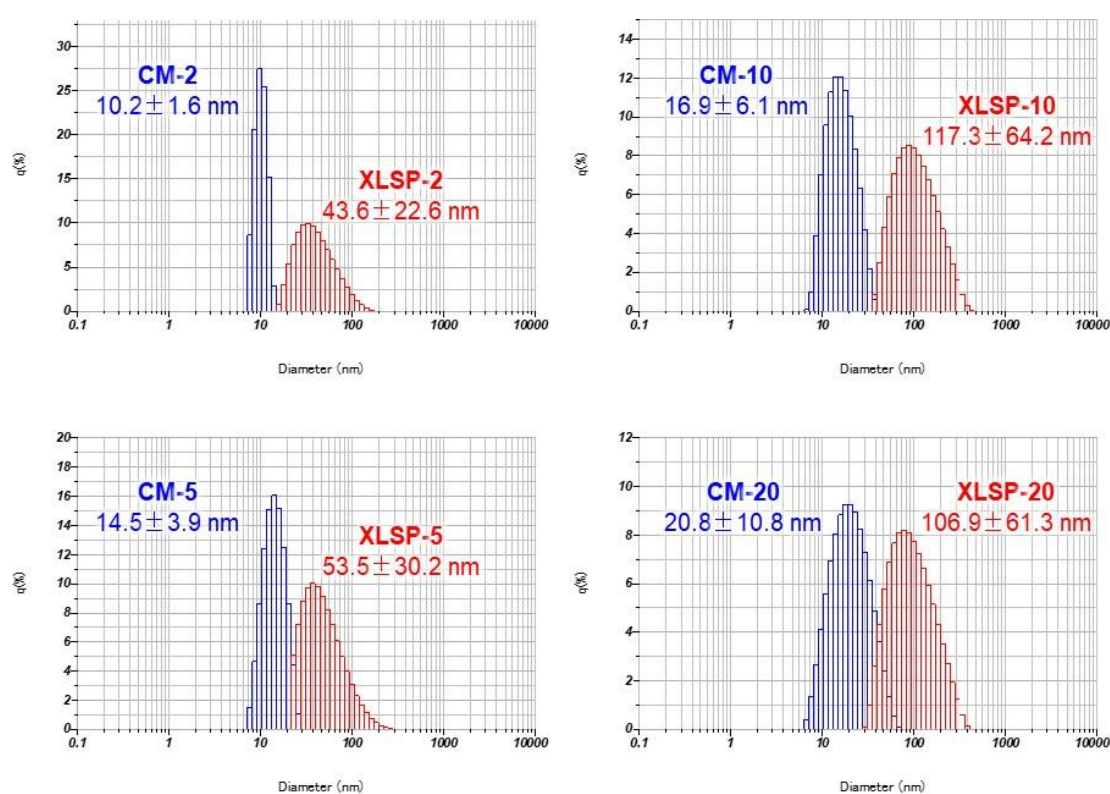

**Figure S1.** Particle size distributions of CMs and XLSPs at [Hb] = 0.010 mM in PBS (pH 7.4).

## 2. SDS-PAGE analysis of XLCM-20 synthesized in a diluted condition

CM-20 was reacted with 2.0 equimolar DBBF in PBS at the further diluted monomer concentration of  $[M]_0 = 0.010$  mM to produce XLCM-20 while avoiding production of XLSP-20 (**Figure 4D**). SDS-PAGE analysis of XLCM-20 shown in **Figure S2** revealed that CM-20 consist of free  $\alpha$  subunits and a ring-closed PEGylated  $\beta$ - $\beta$  subunit ( $\beta$ - $\beta$ -ringPEG: band *f*, which is identical to that in **Figure 5**). Bands ascribed to the polymeric  $\beta$  components (poly( $\beta$ - $\beta$ -PEG); band *g* in **Figure 5**) were not observed in **Figure S2**, indicating no polymerization but the selective production of XLCM-20 by fixing the ring-closed structure.

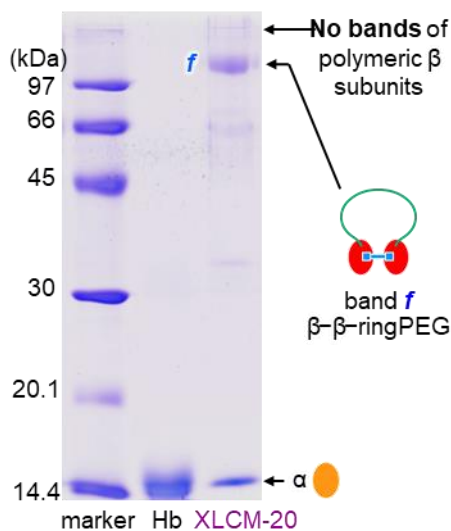

**Figure S2.** SDS-PAGE analysis of XLCM-20 synthesized in a diluted condition ( $[M]_0 = 0.010$  mM).

### 3. Estimation of intra-molecular distance between PEG terminated $\alpha\beta$ dimers from effective molarity

Local concentration of the chain end in the proximity of the other chain end of the same molecule is expressed as an effective concentration.<sup>1</sup> Seen from the one terminal  $\alpha\beta$  dimer of a CM molecule, the average volume in which the other terminal  $\alpha\beta$  dimer exists ( $V_1$ ) is expressed as **Eq. S1.**, where  $d$  (m) is the mean intra-molecular end-to-end distance of  $\alpha\beta$  dimers at PEG terminals (**Figure S3**).

$$V_1 = \frac{4\pi d^3}{3} \quad (\text{m}^3) \quad \cdots \text{ (S1)}$$

The number of CM molecules at  $[M]_0$  (mM) can be described as  $N_A \times [M]_0 \times 10^{-3}$  in 1 L ( $10^{-3}$  m<sup>3</sup>) solution, where  $N_A$  is Avogadro's number. A CM molecule contains two  $\alpha\beta$  dimers (**Figure S3**). The average volume of solution per  $\alpha\beta$  dimer ( $V_2$ ) is described as **Eq. S2.**

$$V_2 = \frac{1}{2N_A[M]_0} \quad (\text{m}^3) \quad \cdots \text{ (S2)}$$

When  $[M]_0 = [M]_{\text{crit}}$ ,  $V_2$  would be identical to  $V_1$ . In other words, the concentration of an inter-molecularly separated  $\alpha\beta$  dimer is equivalent to effective concentration of intra-molecularly PEG-bound  $\alpha\beta$  dimer. Therefore,  $d$  can be described as **Eq. S3.**

$$d = \sqrt[3]{\frac{3}{8\pi N_A[M]_{\text{crit}}}} \quad (\text{m}) \quad \cdots \text{ (S3)}$$

Actually,  $d$  should be approximated as mean end-to-end distances of PEG linker in CM by neglecting the excluded volumes of Hb molecules. Substituting the apparent  $[M]_{\text{crit}}$  for **Eq. S3**, The mean intra-molecular end-to-end distances of CM-2, -5, -10, and -20 are estimated respectively as 61, 84, 117, and 147 Å.

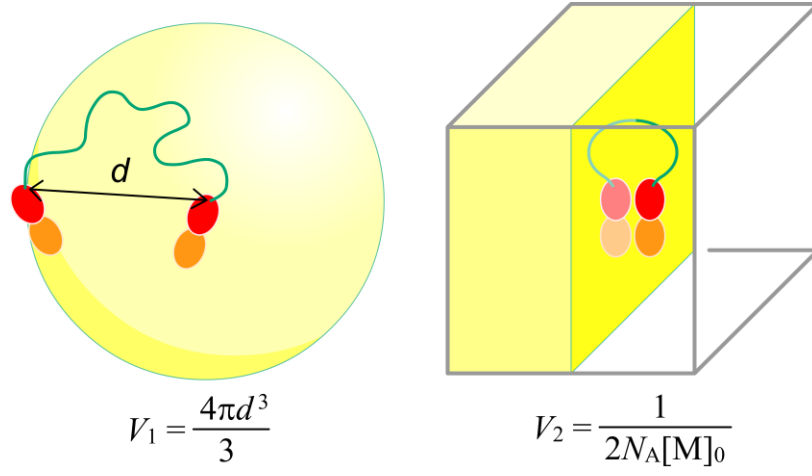

**Figure S3.** Schematic illustration showing the average volume ( $V_1$ ) in which the other terminal  $\alpha\beta$  dimer is present around the terminal  $\alpha\beta$  dimer (left), and the average volume of solution ( $V_2$ ) per  $\alpha\beta$  dimer at CM concentration of  $[M]_0$  (right).

#### 4. Estimation of root-mean-squared end-to-end distance of free PEG chain

Reportedly, the root-mean-squared end-to-end distance ( $r_{\text{rms}}$ ) of a free PEG chain can be estimated theoretically as presented in **Eq. S4**.<sup>2,3</sup>

$$r_{\text{rms}}^2 = C_n n l^2 \quad \cdots \text{ (S4)}$$

In this equation,  $n$  represents the number of atoms,  $l$  denotes the skeletal bond length, and  $C_n$  stand for the experimentally determined characteristic ratio unique to the polymer species, influenced by stiffness, bond angle, and rotational barriers of the polymer chain.<sup>2</sup> The values of  $l$  and  $C_n$  are reported for long PEG as 1.46 Å and 4.1,<sup>3</sup> so that  $r_{\text{rms}}$  of 2, 5, 10, and 20 kDa PEG linkers (2.0, 4.4, 10.5, and 20.8 kDa in actual  $M_n$ ) are estimated respectively as 35, 51, 79, and 111 Å.

## 5. Empirical PEG molecular weight dependence of maximal $[M]_0$ , $[M]_{eq}$ , and DP

The higher  $[M]_0$  is, the higher the degree of polymerization (DP) becomes.<sup>4</sup> However, a limitation in solubility exists for each CM because of the giant molecular masses of Hb molecules and PEG linkers. Following experiment was conducted to ascertain the maximally concentrated  $[M]_0$  of each CM, represented as  $[M]_{max}$ .

Each CM solution was concentrated to the greatest extent possible (maximally) by repeating the 60 min ultrafiltration twice using a centrifugal filter (Amicon Ultra-0.5 mL, 10 kDa cutoff,  $14,000 \times g$ ; Merck Millipore Ltd., Merck KGaA, U.S.A.). Every maximally concentrated CM solution was red-black sticky pastes. Maximally concentrated CM solution of 10  $\mu$ L was picked up using a micropipette equipped with a capillary piston (Microman M25; Gilson Inc., Wisconsin, U.S.A.). Then, it was dissolved in 5 mL of dissolution of a kit (Hemoglobin B-test Wako; Wako Pure Chemical Industries Ltd.). Furthermore, the concentration of Hb unit was determined from absorption spectra. The measurements were conducted three times. A maximally concentrated native Hb solution was also prepared for comparison using the same procedure. As a result, the  $[M]_{max}$  showed the clear exponential decrease concomitantly with the increasing the molecular weight of the PEG linker (**Figure S4**).

As shown in our earlier report,<sup>4</sup> DP can be estimated roughly as  $[M]_0 / [M]_{eq}$  as follows, where  $[M]_0$  signifies the initial monomer concentration and  $[M]_{eq}$  stands for the concentration in the equilibrium state of S-ROP. The ratio of the monomer reacted ( $P$ ) is defined as **Eq. S5**.

$$P = \frac{[M]_0 - [M]_{eq}}{[M]_0} \quad \boxtimes \text{ (S5)}$$

The number average degree of polymerization (DP), defined using  $P$ , is converted to the ratio of  $[M]_0$  to  $[M]_e$  as **Eq. S6**.<sup>5</sup>

$$DP = \frac{1}{1 - P} = \frac{[M]_0}{[M]_{eq}} \quad \boxtimes \text{ (S6)}$$

The value of DP is proportional to both  $[M]_0$  and the reciprocal  $[M]_{eq}$  ( $1/[M]_{eq}$ ). The value of  $1/[M]_{eq}$  is equal to the equilibrium constant  $K$  of polymerization and depolymerization equilibrium for S-ROP.<sup>3</sup> The value of  $1/[M]_{eq}$  obtained in this work (calculated from the value shown in **Figure 7**) showed a quadratic increase with the molecular weight of the PEG linker (**Figure S5**).

From the product of equations of regression curves of **Figures S4** and **S5**, DP for maximally concentrated CM ( $DP_{max}$  at  $[M]_0 = [M]_{max}$ ) can be estimated empirically as shown in **Eq. S7**.

$$DP_{max} \approx (8.54e^{-0.047x}) \times (0.0186x^2 + 0.2290x) \quad \cdots \text{ (S7)}$$

In this equation,  $x$  stands for a molecular weight of PEG linker. The estimated  $DP_{max}$  is shown for the molecular weight of PEG linker (**Figure S6**). By extrapolating this relation above 20 kDa, the estimated  $DP_{max}$  becomes highest ( $DP_{max} = 51$ ) when using a 37 kDa PEG linker.

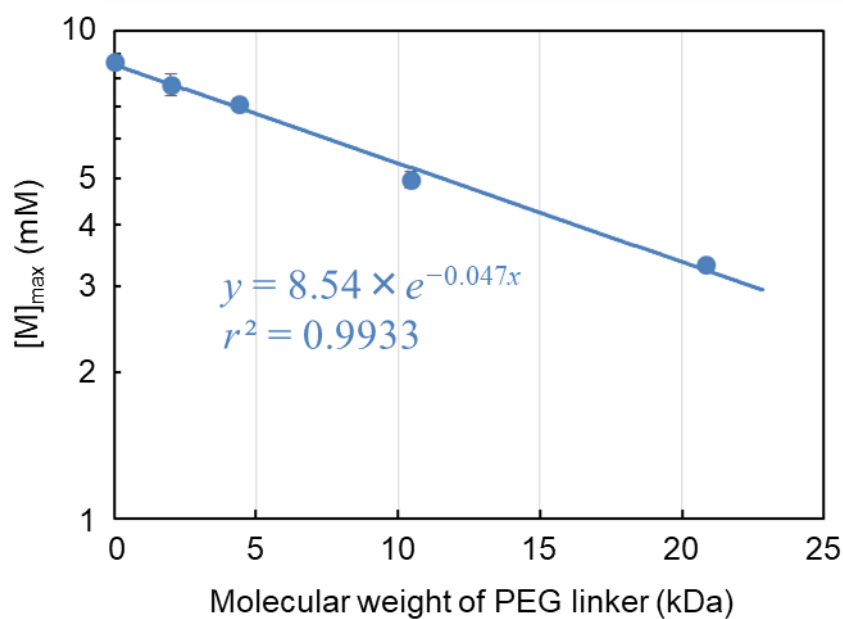

**Figure S4.** Relation between  $[M]_{\max}$  and molecular weight of PEG linker, which is approximated by exponential curve fittings. The error bars represents the standard deviations ( $n = 3$ ).

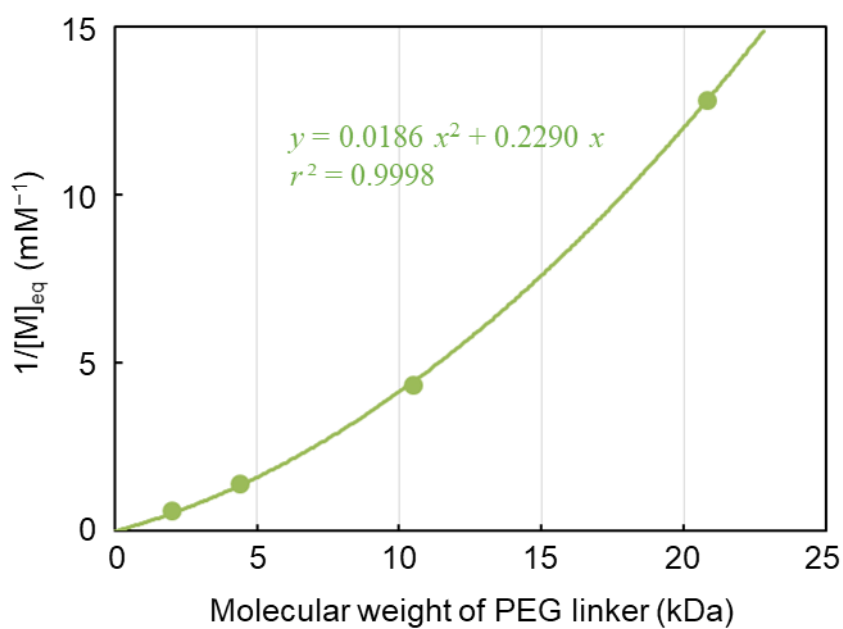

**Figure S5.** Relation between reciprocal  $[M]_{\text{eq}}$  and molecular weight of PEG linker.

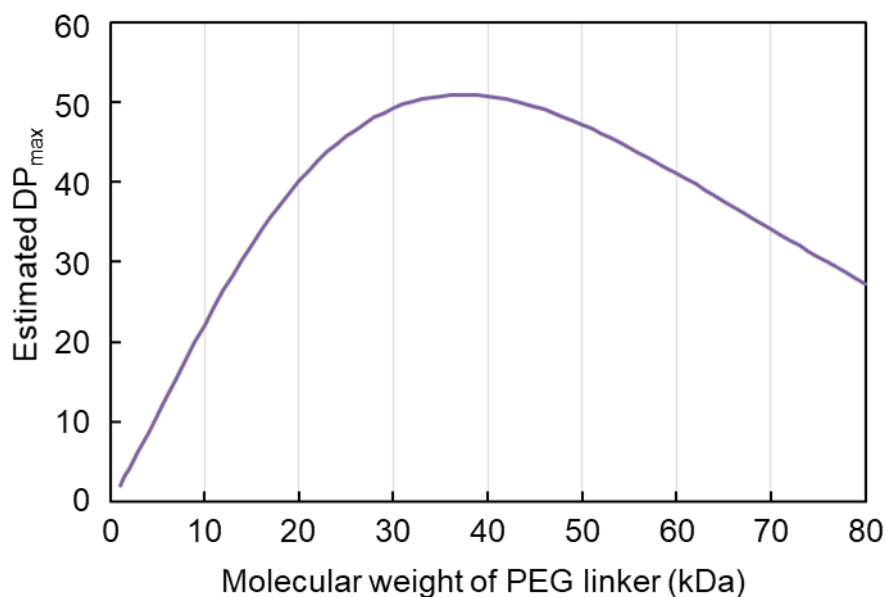

**Figure S6.** Relation between estimated DP<sub>max</sub> and molecular weight of PEG linker.

## References

- (S1) De Greef, T. F.; Smulders, M. M.; Wolffs, M.; Schenning, A. P.; Sijbesma, R. P.; Meijer, E. W. Supramolecular polymerization. *Chem. Rev.* **2009**, *109*(11), 5687–5754.
- (S2) Bastings, M. M. C.; De Greef, T. F. A.; Van Dongen, J. L. J.; Merks, M.; Meijer, E. W. Macrocyclization of enzyme-based supramolecular polymers. *Chem. Sci.* **2010**, *1*, 79–88.
- (S3) Powers, S. P.; Foo, I.; Pinon, D.; Klueppelberg, U. G.; Hedstrom, J. F.; Miller, L. J. Use of photoaffinity probes containing poly(ethylene glycol) spacers for topographical mapping of the cholecystinin receptor complex. *Biochemistry* **1991**, *30*(3), 676–682.
- (S4) Matsuhira, T.; Yamamoto, K.; Sakai, H. Ring-opening polymerization of hemoglobin. *Biomacromolecules* **2019**, *20*(4), 1592–1602.
- (S5) Stille, J. K. Step-growth polymerization. *J. Chem. Educ.* **1981**, *58*(11), 682–686.
